# Supplementary material for: Tetravalent Bispecific Tandem Antibodies Improve Brain Exposure and Efficacy in an Amyloid Transgenic Mouse Model
Source: PubMed Central journal article supplement — Mol Ther Methods Clin Dev. 2020 Aug 21;19:58–77. doi: 10.1016/j.omtm.2020.08.014 (PMC7502788; doi:10.1016/j.omtm.2020.08.014), 2020-08-21

## **Supplemental Information**

### **Tetravalent Bispecific Tandem Antibodies**

#### **Improve Brain Exposure and Efficacy**

#### **in an Amyloid Transgenic Mouse Model**

**Tuan-Minh Do, Cécile Capdevila, Laurent Pradier, Véronique Blanchard, Mati Lopez-Grancha, Nathalie Schussler, Anke Steinmetz, Jochen Beninga, Denis Boulay, Philippe Dugay, Patrick Verdier, Nadine Aubin, Gihad Dargazanli, Catarina Chaves, Elisabeth Genet, Yves Lossouarn, Christophe Loux, François Michoux, Nicolas Moindrot, Franck Chanut, Thierry Gury, Stéphanie Eyquem, Delphine Valente, Olivier Bergis, Ercole Rao, and Dominique Lesuisse**

**Table S1. Pharmacokinetic data of TBTI1-6 in WT mice**

| Dosing                 | Strain    | Compound                                                                 | Matrix                    | C <sub>max</sub> or C <sub>0</sub> | t <sub>max</sub> | AUC <sub>0-3day</sub> | AUC <sub>0-7day</sub> | t <sub>last</sub> | Max % of injected dose / g of brain | Brain / Plasma AUC <sub>0-3day</sub> ratio% | Brain / Plasma AUC <sub>0-7day</sub> ratio% | TBTi / 13C3 Brain max% | TBTi / 13C3 Brain AUC | Study        | RA / Batch   |
|------------------------|-----------|--------------------------------------------------------------------------|---------------------------|------------------------------------|------------------|-----------------------|-----------------------|-------------------|-------------------------------------|---------------------------------------------|---------------------------------------------|------------------------|-----------------------|--------------|--------------|
|                        |           |                                                                          |                           | (nmol/L or /kg)                    | (day)            | (nmol.day/L or /kg)   | (nmol.day/L or /kg)   | (day)             |                                     | ratio                                       | ratio                                       | ratio                  | ratio                 | Ref.         | Id.          |
| IV Bolus<br>70 nmol/kg | Wild type | 13C3                                                                     | Plasma                    | 899                                | -                | 1420                  | 2770                  | 7                 | -                                   | -                                           | -                                           | -                      | -                     | ABS0758      | SAR220590    |
|                        |           |                                                                          | Total Brain               | 0.445                              | 3                | 0.827                 | 2.64                  | 7                 | 0.0337                              | 0.058                                       | 0.0954                                      | -                      | -                     |              |              |
|                        |           |                                                                          | Parenchyma                | -                                  | -                | -                     | -                     | -                 | -                                   | -                                           | -                                           | -                      | -                     |              |              |
|                        |           | 13C3                                                                     | Plasma                    | 1260                               | -                | 1660                  | 3390                  | 7                 | -                                   | -                                           | -                                           | -                      | -                     | ABS0721-2    | SAR220590    |
|                        |           |                                                                          | Total Brain               | -                                  | -                | -                     | -                     | -                 | -                                   | -                                           | -                                           | -                      | -                     |              |              |
|                        |           |                                                                          | Parenchyma                | 0.589                              | [1 - 7]          | 1.24                  | 3.36                  | 7                 | 0.036                               | 0.075                                       | 0.099                                       | -                      | -                     |              |              |
|                        |           | TBTi 1<br>TBTi-(anti-Abeta-13C3 x anti-TfR-8D3)-mulgG1                   | Plasma                    | NC                                 | -                | 434                   | 436                   | 7                 | -                                   | -                                           | -                                           | -                      | -                     | ABS0758      | RA10876562   |
|                        |           |                                                                          | Total Brain               | 4.42                               | 1                | 8.88                  | 10.1                  | 3                 | 0.298                               | 2.05                                        | 2.32                                        | 8.84                   | 10.7                  |              |              |
|                        |           |                                                                          | Parenchyma                | 2.04                               | 1                | 4.34                  | 5.28                  | 7                 | 0.14                                | 1.00                                        | 1.21                                        | 3.9                    | 3.5                   |              |              |
|                        |           | TBTi 1<br>TBTi-(anti-Abeta-13C3 x anti-TfR-8D3)-mulgG1                   | Plasma                    | 1390                               | -                | 513                   | -                     | 3                 | -                                   | -                                           | -                                           | -                      | -                     | ABS0721-4    | RA10876562   |
|                        |           |                                                                          | -                         | -                                  | -                | -                     | -                     | -                 | -                                   | -                                           | -                                           | -                      | -                     |              |              |
|                        |           |                                                                          | Parenchyma                | 2.27                               | [0.083-1]        | 5.18                  | -                     | 3                 | 0.13                                | 1.00                                        | -                                           | 3.6                    | 4.2                   |              |              |
|                        |           | TBTi 2<br>TBTi-(anti-TfR-8D3 x anti-Abeta-13C3)-mulgG1                   | Plasma                    | 1090                               | -                | 357                   | -                     | 3                 | -                                   | -                                           | -                                           | -                      | -                     | BPK-VA-50006 | VAB.QDJ3.89B |
|                        |           |                                                                          | Total Brain (TfR capture) | 4.12                               | 0.083            | 7.99                  | -                     | 3                 | 0.28                                | 2.24                                        | -                                           | 8.2                    | 9.7                   |              |              |
|                        |           |                                                                          | Parenchyma                | -                                  | -                | -                     | -                     | -                 | -                                   | -                                           | -                                           | -                      | -                     |              |              |
|                        |           | TBTi 3<br>TBTi-(anti-Abeta-13C3xanti-TfR-8D3)-LCY92A-mulgG1              | Plasma                    | NC                                 | -                | 493                   | -                     | 3                 | -                                   | -                                           | -                                           | -                      | -                     | ABS0721-14a  | VA216205     |
|                        |           |                                                                          | Total Brain               | 5.08                               | 1                | 12.1                  | -                     | 3                 | 0.322                               | 2.45                                        | -                                           | 9.55                   | 14.6                  |              |              |
|                        |           |                                                                          | Parenchyma                | 3                                  | 1                | 6.88                  | -                     | 3                 | 0.19                                | 1.40                                        | -                                           | 5.3                    | 5.5                   |              |              |
|                        |           | TBTi 4<br>TBTi-(anti-Abeta-13C3xanti-TfR-8D3)-HCY52A-mulgG1              | Plasma                    | 1450                               | -                | 1600                  | -                     | 3                 | -                                   | -                                           | -                                           | -                      | -                     | ABS0721-14b  | VA216206     |
|                        |           |                                                                          | Total Brain               | 2.61                               | 1                | 6.93                  | -                     | 3                 | 0.116                               | 0.433                                       | -                                           | 3.44                   | 8.38                  |              |              |
|                        |           |                                                                          | Parenchyma                | 1.79                               | 1                | 4.86                  | -                     | 3                 | 0.08                                | 0.304                                       | -                                           | 2.2                    | 3.9                   |              |              |
|                        |           | TBTi 5<br>TBTi-(anti-Abeta-13C3xanti-TfR-8D3)-HCY52A-LCY92A-mulgG1       | Plasma                    | 1410                               | -                | 1770                  | -                     | 3                 | -                                   | -                                           | -                                           | -                      | -                     | BPK-VA-50007 | VAB.QDJ3.88B |
|                        |           |                                                                          | Total Brain               | 1.44                               | 3                | 3.65                  | -                     | 3                 | 0.0921                              | 0.21                                        | -                                           | 2.73                   | 4.41                  |              |              |
|                        |           |                                                                          | Parenchyma                | -                                  | -                | -                     | -                     | -                 | -                                   | -                                           | -                                           | -                      | -                     |              |              |
|                        |           | TBTi 6<br>Anti-Abeta-13C3xanti-TfR-8D3 HC-Y52A-S101A LC-Y92A-Y49A mulgG1 | Plasma                    | 1230                               | -                | 1840                  | -                     | 3                 | -                                   | -                                           | -                                           | -                      | -                     | BPK-VA-50011 | VA2-16-326-1 |
|                        |           |                                                                          | Total Brain               | 3.61                               | 1                | 8.06                  | -                     | 3                 | 0.216                               | 0.439                                       | -                                           | 6.41                   | 9.75                  |              |              |
|                        |           |                                                                          | Parenchyma                | 2.91                               | 1                | 6.79                  | -                     | 3                 | 0.174                               | 0.368                                       | -                                           | 4.8                    | 5.5                   |              |              |

Anti-TfR/anti-A $\beta$  (TBTi) or control antibody was administered to wild-type (WT) mice at a dose of 70 nmol/kg. Blood samples were collected in heparinized tubes from posterior vena cava at 5 min and at 2, 5, 24 and 72 h after single IV bolus administration and plasma collected by centrifugation for 10 min at 1500 g. Immediately after blood sampling, mice were perfused via the left ventricle with 50 mL of ice-cold phosphate buffer saline (524560, Calbiochem, San Diego, CA). The mouse brain cortex was harvested, frozen immediately on dry-ice and stored at -80°C until use for antibody quantification. Pharmacokinetic analyses were performed using non-compartmental method (Phoenix-WinNonLin, version 6.4).

**Table S2. Plasma parameters (nmol/L or /kg) of 13C3 and TBTI1 concentrations (nmol/L or /kg) following intravenous (70 nmol/kg) administration to C57BL/6 Wild type and APP/PS1 transgenic male mice**

| Compound | Mouse strain | C0 or Cmax (nmol/L) | AUC0-7day (nmol.day/L) |
|----------|--------------|---------------------|------------------------|
| 13C3     | WT           | 899                 | 2770                   |
|          | APP/PS1      | 959                 | 3550                   |
| TBTI1    | WT           | 569                 | 436                    |
|          | APP/PS1      | 766                 | 807                    |

Anti-TfR/anti-A $\beta$  (TBTI1) or control antibody 13C3 were administered to wild-type (WT) or APP/PS1 mice at a dose of 70 nmol/kg. Blood samples were collected in heparinized tubes from posterior vena cava at 5 min and at 2, 5, 24 and 72 h after single IV bolus administration and plasma collected by centrifugation for 10 min at 1500 g. Pharmacokinetic analyses were performed using non-compartmental method (Phoenix-WinNonLin, version 6.4).

**Table S3. Hematological evaluation of APPSL mice treated with anti-A $\beta$  (TBTIs or 13C3) or control IgG1 antibodies**

| Groups                 |             | RBC           | HGB          | HCT          | MCV          | MCH          | MCHC         | RDW          | Platelet      | Reticulocytes | WBC          | Neutrophils  | Lymphocytes  | Monocytes    | Eosinophils  | Basophils    | LU Cells     |
|------------------------|-------------|---------------|--------------|--------------|--------------|--------------|--------------|--------------|---------------|---------------|--------------|--------------|--------------|--------------|--------------|--------------|--------------|
|                        |             | 10E12/L       | g/L          | %            | fl           | pg           | g/L          | %            | 10E9/L        | 10E12/L       | 10E9/L       |
| Ctrl IgG1 (70 nmol/kg) | <b>Mean</b> | <b>9.070</b>  | <b>132.3</b> | <b>45.67</b> | <b>50.37</b> | <b>14.57</b> | <b>289.0</b> | <b>13.3</b>  | <b>1219</b>   | <b>0.254</b>  | <b>4.14</b>  | <b>0.567</b> | <b>3.303</b> | <b>0.147</b> | <b>0.113</b> | <b>0.003</b> | <b>0.015</b> |
| APPSL                  | STD         | 0.267         | 4.041        | 1.557        | 0.416        | 0.208        | 2.646        | 0.361        | 100.409       | 0.017         | 1.77         | 0.247        | 1.745        | 0.146        | 0.040        | 0.006        | 0.021        |
| 13C3a (70 nmol/kg)     | <b>Mean</b> | <b>10.031</b> | <b>142.6</b> | <b>49.23</b> | <b>49.07</b> | <b>14.21</b> | <b>289.6</b> | <b>13.24</b> | <b>1110.3</b> | <b>0.2514</b> | <b>5.234</b> | <b>0.531</b> | <b>4.501</b> | <b>0.080</b> | <b>0.097</b> | <b>0.007</b> | <b>0.030</b> |
| APPSL                  | STD         | 0.305         | 4.6          | 1.31         | 0.75         | 0.24         | 4.1          | 0.25         | 204.6         | 0.0111        | 0.900        | 0.243        | 0.892        | 0.051        | 0.078        | 0.005        | 0.012        |
| TBTI3a (15 nmol/kg)    | <b>Mean</b> | <b>9.083</b>  | <b>124.0</b> | <b>43.68</b> | <b>48.10</b> | <b>13.63</b> | <b>283.8</b> | <b>15.78</b> | <b>1129.0</b> | <b>0.4355</b> | <b>4.553</b> | <b>0.742</b> | <b>3.540</b> | <b>0.105</b> | <b>0.143</b> | <b>0.008</b> | <b>0.020</b> |
| APPSL                  | STD         | 0.358         | 5.8          | 2.14         | 1.32         | 0.44         | 7.0          | 0.84         | 163.1         | 0.1184        | 0.682        | 0.623        | 0.352        | 0.113        | 0.045        | 0.004        | 0.007        |
| TBTI6a (15 nmol/kg)    | <b>Mean</b> | <b>9.656</b>  | <b>139.0</b> | <b>47.90</b> | <b>49.63</b> | <b>14.40</b> | <b>290.4</b> | <b>13.15</b> | <b>1197.6</b> | <b>0.2516</b> | <b>4.525</b> | <b>0.411</b> | <b>3.930</b> | <b>0.064</b> | <b>0.098</b> | <b>0.006</b> | <b>0.019</b> |
| APPSL                  | STD         | 0.345         | 5.3          | 1.68         | 0.84         | 0.20         | 3.9          | 0.39         | 112.2         | 0.0253        | 0.710        | 0.189        | 0.669        | 0.085        | 0.051        | 0.005        | 0.009        |
| Ctrl IgG1 (70 nmol/kg) | <b>Mean</b> | <b>9.585</b>  | <b>143.0</b> | <b>48.10</b> | <b>50.35</b> | <b>14.95</b> | <b>297.0</b> | <b>13.00</b> | <b>1040.5</b> | <b>0.2895</b> | <b>7.170</b> | <b>0.870</b> | <b>6.005</b> | <b>0.140</b> | <b>0.100</b> | <b>0.015</b> | <b>0.045</b> |
| WT                     | STD         | 0.629         | 2.8          | 0.71         | 4.03         | 1.34         | 1.4          | 0.14         | 163.3         | 0.0502        | 0.778        | 0.523        | 0.361        | 0.028        | 0.057        | 0.007        | 0.021        |

Male APPSL mice were treated once a week by IP administration with one of the following antibodies: Ctrl-IgG1 (70 nmol/kg), 13C3a (70 nmol/kg), TBTI3a (15 nmol/kg) and TBTI6a (15 nmol/kg) for 4 months. WT control mice were also treated with 70 nmol/kg of Ctrl-IgG1 under the same regimen. One week after the last treatment, animals were sacrificed, and blood was collected for hematological studies. Compared to control IgG1 treated groups, slightly to moderately lower RBC mass parameters and moderately higher reticulocytes and neutrophils counts were observed for mice treated with TBTI3a at 15 nmol/kg. No difference in hematological parameters was observed for TBTI6a treated group.

**Table S4. Histopathological evaluation of APPSL mice treated with anti-A $\beta$  (TBTIs or 13C3) or control IgG1 antibodies**

| Treatment groups                 | Animal number | Liver histopathology                                                 | Spleen histopathology                    |
|----------------------------------|---------------|----------------------------------------------------------------------|------------------------------------------|
| APPSL<br>Ctrl IgG1<br>70 nmol/kg | 12            | Minimal necrosis                                                     | Minimal extramedullary hemopoiesis       |
|                                  | 18            | Within normal limits                                                 | Minimal decreased white pulp cellularity |
|                                  | 21            | Within normal limits                                                 | Within normal limits                     |
|                                  | 35            | Minimal necrosis                                                     | Within normal limits                     |
|                                  | 39            | Minimal necrosis                                                     | Minimal increased white pulp cellularity |
|                                  | 43            | Within normal limits                                                 | Within normal limits                     |
|                                  | 45            | Mild centrilobular hypertrophy                                       | Within normal limits                     |
|                                  | 47            | Within normal limits                                                 | Within normal limits                     |
|                                  | 51            | Within normal limits                                                 | Within normal limits                     |
| APPSL<br>TBTI3a<br>15 nmol/kg    | 19            | Minimal centrilobular hypertrophy                                    | Mild extramedullary hemopoiesis          |
|                                  | 26            | Minimal centrilobular hypertrophy<br>Minimal necrosis                | Minimal extramedullary hemopoiesis       |
|                                  | 29            | Minimal centrilobular hypertrophy                                    | Mild Extramedullary hemopoiesis          |
|                                  | 30            | Mild centrilobular hypertrophy<br>Mild mononuclear cell infiltration | Minimal decreased white pulp cellularity |
|                                  | 33            | Minimal necrosis                                                     | Minimal extramedullary hemopoiesis       |
|                                  | 46            | Within normal limits                                                 | Within normal limits                     |
|                                  | 49            | Within normal limits                                                 | Within normal limits                     |
|                                  | 50            | Minimal centrilobular hypertrophy<br>Minimal necrosis                | Minimal extramedullary hemopoiesis       |
|                                  | 13            | Minimal mononuclear cell infiltration                                | Within normal limits                     |
| APPSL<br>13C3a<br>70 nmol/kg     | 17            | Minimal necrosis                                                     | Within normal limits                     |
|                                  | 24            | Within normal limits                                                 | Minimal decreased white pulp cellularity |
|                                  | 25            | Within normal limits                                                 | Within normal limits                     |
|                                  | 32            | Minimal necrosis                                                     | Minimal decreased white pulp cellularity |
|                                  | 34            | Minimal necrosis                                                     | Within normal limits                     |
|                                  | 38            | Within normal limits                                                 | Minimal decreased white pulp cellularity |
|                                  | 41            | Within normal limits                                                 | Within normal limits                     |
|                                  | 44            | Within normal limits                                                 | Within normal limits                     |
|                                  | 14            | Minimal necrosis                                                     | Within normal limits                     |
|                                  | 15            | Mild necrosis                                                        | Within normal limits                     |
| APPSL                            | 16            | Minimal necrosis                                                     | Minimal decreased white pulp cellularity |
|                                  | 20            | Minimal mononuclear cell infiltration                                | Minimal decreased white pulp cellularity |

|                               |    |                                                                                                                |                                          |
|-------------------------------|----|----------------------------------------------------------------------------------------------------------------|------------------------------------------|
| TBTI6a<br>15 nmol/kg          | 22 | Within normal limits                                                                                           | Minimal decreased white pulp cellularity |
|                               | 27 | Within normal limits                                                                                           | Within normal limits                     |
|                               | 31 | Within normal limits                                                                                           | Minimal decreased white pulp cellularity |
|                               | 37 | Minimal necrosis                                                                                               | Minimal decreased white pulp cellularity |
|                               | 52 | Minimal necrosis                                                                                               | Within normal limits                     |
|                               | 53 | Within normal limits                                                                                           | Within normal limits                     |
| WT<br>Ctrl IgG1<br>70 nmol/kg | 1  | Minimal centrilobular hypertrophy                                                                              | Minimal increased white pulp cellularity |
|                               | 2  | Minimal mononuclear cell infiltration                                                                          | Minimal decreased white pulp cellularity |
|                               | 3  | Minimal necrosis                                                                                               | Within normal limits                     |
|                               | 4  | Within normal limits                                                                                           | Within normal limits                     |
|                               | 5  | Minimal centrilobular hypertrophy                                                                              | Within normal limits                     |
|                               | 6  | Within normal limits                                                                                           | Within normal limits                     |
|                               | 7  | Minimal necrosis                                                                                               | Within normal limits                     |
|                               | 8  | Mild hepatocellular degeneration with increased number of mitotic figures, abnormal mitosis and anisokaryosis. | Within normal limits                     |
|                               | 9  | Minimal necrosis                                                                                               | Within normal limits                     |
|                               | 10 | Within normal limits                                                                                           | Within normal limits                     |
|                               | 11 | Within normal limits                                                                                           | Within normal limits                     |

Male APPSL mice were treated once a week by IP administration with one of the following antibodies: Ctrl-IgG1 (70 nmol/kg), 13C3a (70 nmol/kg), TBTI3a (15 nmol/kg) and TBTI6a (15 nmol/kg) for 4 months. WT control mice were also treated with 70 nmol/kg of Ctrl-IgG1 under the same regimen. One week after the last treatment, animals were sacrificed, and liver and spleen were harvested and treated with 4% formaldehyde for histopathological studies.

**Table S5. Comparison of TBTI3 after 1 and 2 administrations**

| AUC0-3d<br>(nmol.d/L or /kg) |        | B/P  | Max<br>%ID/g | Dose               | Administration |             |
|------------------------------|--------|------|--------------|--------------------|----------------|-------------|
| Brain                        | Plasma |      |              |                    |                |             |
| 12.1                         | 493    | 2.44 | 0.322        | 14 mpk (70 nmolKg) | IV             | Single dose |
| 5.00                         | 56.9   | 8.78 | 0.783        | 4 mpk (20 nmolKg)  | IP             | Repeat dose |

Anti-TfR/anti-A $\beta$  (TBTI3) was administered to wild-type (WT) mice at a dose of 70 nmol/kg IV and 20 nmol/kg IP, respectively. Blood samples were collected in heparinized tubes from posterior vena cava at 5, 24 and 72 h after single IV bolus and 2 repeat IP administrations and plasma collected by centrifugation for 10 min at 1500 g. Immediately after blood sampling, mice were perfused via the left ventricle with 50 mL of ice-cold phosphate buffer saline (524560, Calbiochem, San Diego, CA). The mouse brain cortex was harvested, frozen immediately on dry-ice and stored at -80°C until use for antibody quantification. Pharmacokinetic analyses were performed using non-compartmental method (Phoenix-WinNonLin, version 6.4).

**Figure S1. Kinetic curves of Total Radiance Efficiency detected in blood samples of wild-type as compared to transgenic APPSL mice, following caudal IV administration of the labeled fluorescent antibody TBTI3a-AF750.** The fluorescent molecules were detected by *ex vivo* epi-illumination imaging procedures (at emission filter: 800 nm; excitation filter: 745 nm) applied on blood samples collected in a well-plate: at 3; 72 and 168 h following TBTI3a-AF750 intravenous administration. Each symbol represents the mean ( $\pm$  the SEM) of detected total radiance efficiency (flux).

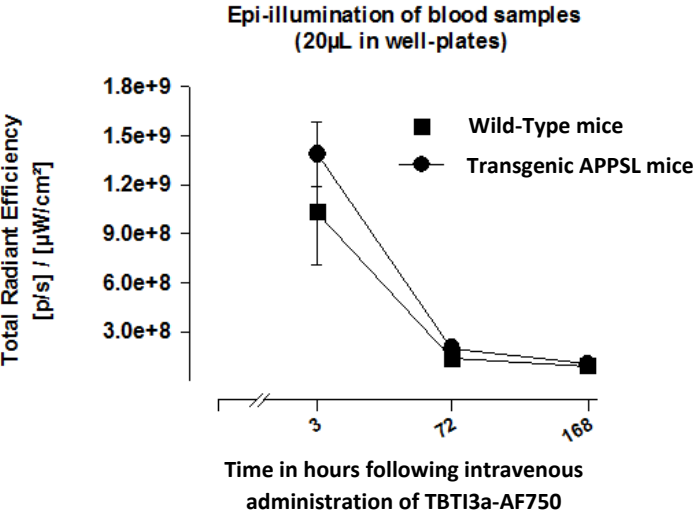



**Figure S2. Illustration of TBTI3-AF488 labelled antibody detectable in vasculature APPSL transgenic mouse.** Representative images of green fluorescent of TBTI3-AF488 labelled administered antibodies (72 h after second IV injections at 20 mg/kg) within thalamic, cortical and hippocampal vascular structures. Tissue was counterstained with DAPI. Scale bar equals 50  $\mu$ m.

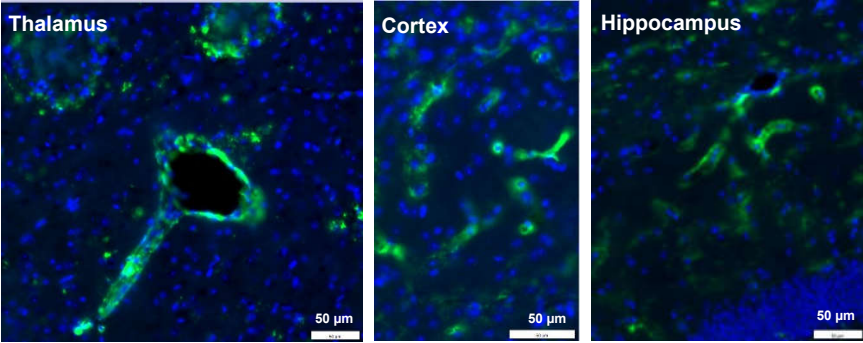

**Figure S3: Unexplained increase of small A $\beta$  deposit number in hippocampus of APPSL transgenic mice treated for 4 months with TBTI3a antibody.** Representative images of A $\beta$  immunolabelling in hippocampal parenchyma of 4 animals treated with control Ctrl-IgG1 (A, B, E, F) and 4 animals treated with TBTI3a antibody (C, D, G, H).

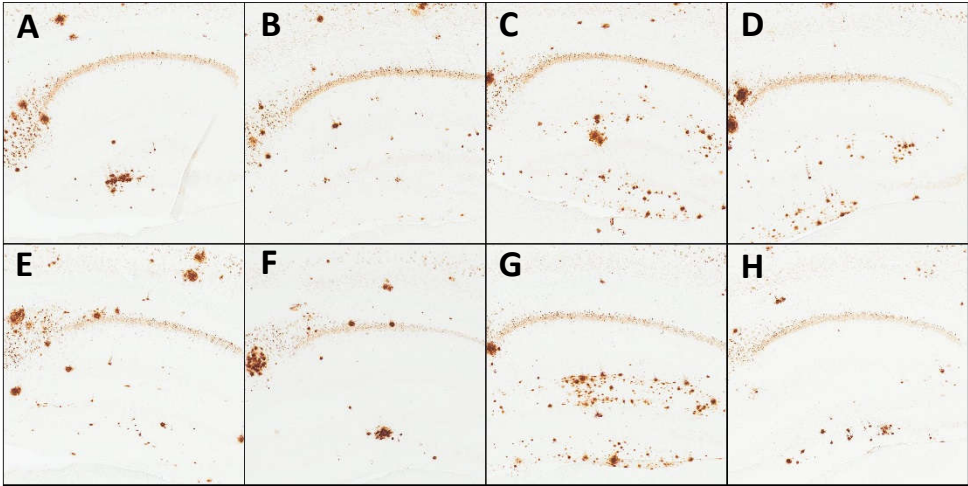

**Figure S4: *In vitro* uptake of anti-TfR/anti-A $\beta$  antibodies TBTI2a, TBTI3a and TBTI6a in mouse primary neurons and in the mouse brain microvascular endothelial bEnd.3 cell line.** (A) Antibody uptake in mouse primary cortical neurons (DIV10) and (B) in bEnd.3 cells following an exposure to each of the tested constructs at 5 nM and 50 nM, respectively, for 2 h at 37°C. Following the incubation period, cells were rinsed with PBS (-/-) containing 0.5% acetic acid, fixed with PFA 4%, permeabilized in PBS 0.2% Triton X-100, and probed for the internalized antibody with either AF633-coupled or AF488-coupled anti-mouse IgG. Cellular membranes and nuclei were stained by using Wheat Germ Agglutinin (WGA) coupled to AF555 and Hoescht33342, respectively. Confocal images were obtained using an Operetta CLS™ high-content analysis system.

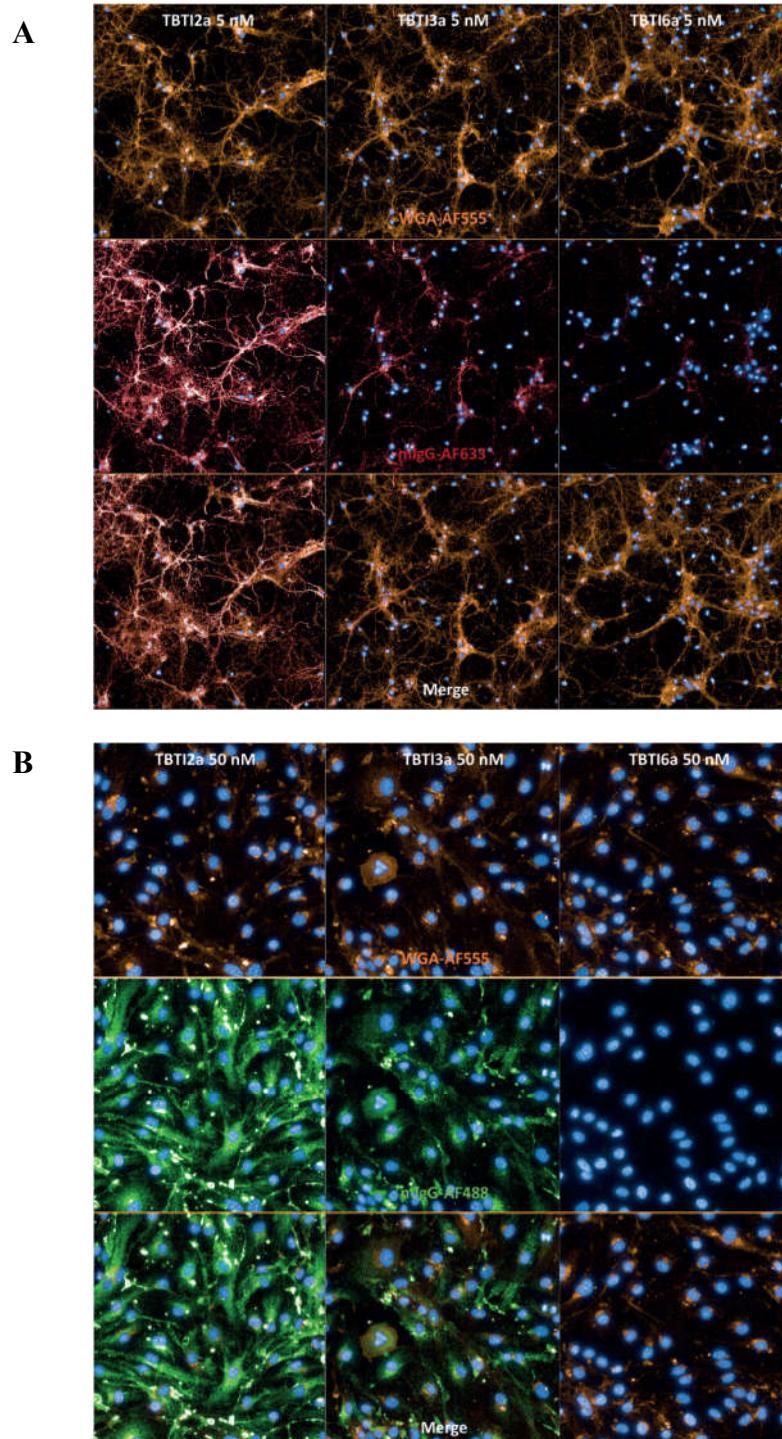

Supplement: mmc1.pdf [file mmc1.pdf]
